# Supplementary material for: Genome Sequences of Akhmeta Virus, an Early Divergent Old World Orthopoxvirus
Source: MDPI journal article supplement (doi:10.3390/v10050252), 2018-05-12
Supplement: s1 [file s1]

**Table S4.** The NR and TR regions in the ITR of Old World OPXVs

| Genomes        | NR1<br>(bp)     | TR1<br>(bp) | Major Pattern of<br>Repeat in TR1 | NR2<br>(bp) | TR2<br>(bp) | Major Pattern of<br>Repeat in TR2 | NR3 (bp) | Full ITR (bp)^ |
|----------------|-----------------|-------------|-----------------------------------|-------------|-------------|-----------------------------------|----------|----------------|
| VACV_WR        | 81              | 912         | <b>70</b> (12.7)                  | 306         | 2,036       | <b>70</b> (19); <b>54</b> (8.3)   | 6,742    | 10,077         |
| HSPV_MNR76     | 81              | 92          | <b>70</b> (1.3)                   | 304         | 108         | <b>6</b> (3)                      | 6,922    | 7,507          |
| AKMV_AKHM13-88 | 78              | 604         | <b>86</b> (6.3)                   | 300         | 740         | <b>60</b> (11.5)                  | 7,003    | 8,725          |
| CPXV_BR        | 81              | 1,515       | <b>78</b> (2.7); <b>177</b> (7.5) | 303         | 537         | <b>125</b> (3.2)                  | 7,165    | 9,600          |
| CPXV_GRI-90    | 81              | 489         | <b>70</b> (6.8)                   | 309         | 291         | <b>39</b> (2.2)                   | 7,108    | 8,278          |
| ECTV_ERPV      | 80              | 162         | <b>70</b> (2.3)                   | 304         | 937         | <b>85</b> (10.4)                  | 5,540    | 7,022          |
| MPXV_CNG03     | 75              | 280         | <b>70</b> (3.7)                   | 300         | 104         | <b>8</b> (2.2)                    | 5,719    | 6,477          |
| CMLV_CMS*      | 81              | 264         | <b>71</b> (2.7)                   | n/a         | 102         | <b>6</b> (10)                     | 5,602    | 6,049          |
| TATV_DAH       | 72 <sup>#</sup> | 141         | <b>33</b> (3.5) <sup>\$</sup>     | 303         | 138         | <b>6</b> (3)                      | 4,124    | 4,779          |
| VARV_CHN48     | 75              | 345         | <b>69</b> (4.8)                   | 302         | n/a         | n/a                               | n/a      | 728            |

Bold number indicates the length of a repeat unit; copy number is in parenthesis; fraction indicates the presence of an incomplete repeat unit. \*, lacking NR2; <sup>#</sup>, short NR1 probably due to insufficient sequencing at the genomic terminus; <sup>\$</sup>, low percent match (68%); ^ the bases in the terminal hairpins are excluded.
