# Supplementary material for: Genome Sequences of Akhmeta Virus, an Early Divergent Old World Orthopoxvirus
Source: MDPI journal article supplement (doi:10.3390/v10050252), 2018-05-12
Supplement: s1 [file s1]

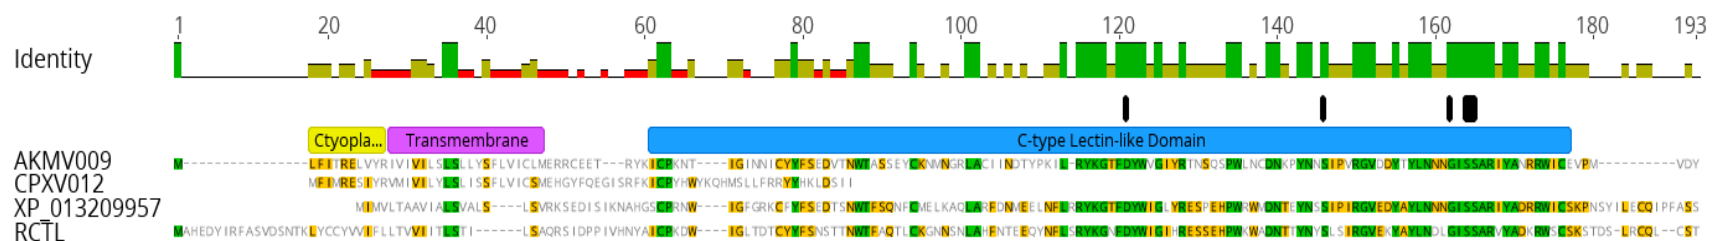

**Figure S1.** Protein sequence alignment of AKMV009 with three similar proteins: AKMV009 from AKMV\_AKHM13-88, CPXV012 from CPXV\_BR, XP\_013209957 (a C-type lectin-like protein) from *Microtus ochrogaster* (Prairie Vole), and RCTL, the lectin-like molecule from cytomegalovirus. Sequence identity is displayed on the top (100% green, at least 30% and under 100% greeny-brown, under 30% red). Yellow box shows the predicted cytoplasmic domain; pink box indicates the transmembrane region; blue box shows the C-type lectin-like domain, and black boxes indicate the five residues essential for lectin binding to its ligand. –, indicate gaps in the alignment.
