# Supplementary material for: Genome Sequences of Akhmeta Virus, an Early Divergent Old World Orthopoxvirus
Source: MDPI journal article supplement (doi:10.3390/v10050252), 2018-05-12
Supplement: s1 [file s1]

**Table S6.** Different genes between AKMV\_AKMV13-88 and CPXV-BR in the ITR and terminal regions

| AKMV                      | CPXV_BR | Function                                    | Reference |
|---------------------------|---------|---------------------------------------------|-----------|
| 1. Different presence     |         |                                             |           |
| -                         | CPXV001 | Integral component of membrane              | -         |
| -                         | CPXV002 | -                                           | -         |
| -                         | CPXV004 | Integral component of membrane              | -         |
| -                         | CPXV010 | -                                           | -         |
| -                         | CPXV013 | Kelch-like protein                          | [1]       |
| -                         | CPXV160 | Integral component of membrane              | -         |
| -                         | CPXV161 | A29 homolog, virus budding                  | -         |
| -                         | CPXV192 | Integral component of membrane              | -         |
| -                         | CPXV214 | -                                           | -         |
| -                         | CPXV216 | S signal peptide                            | -         |
| -                         | CPXV221 | Tumor necrosis factor receptor              | [2, 3]    |
| AKMV007                   | -       | Kelch repeat and BTB-containing domain      | -         |
| AKMV214                   | -       | Receptor of TNF and various chemokines      | [2]       |
| 2. Truncated in AKMV      |         |                                             |           |
| AKMV004                   | CPXV007 | -                                           | -         |
| AKMV156                   | CPXV158 | ATI protein                                 | -         |
| AKMV162                   | CPXV166 | Hypothetical protein                        | -         |
| AKMV163                   | CPXV167 | DNA packaging                               | -         |
| AKMV182                   | CPXV186 | Thymidylate kinase                          | -         |
| AKMV211                   | CPXV218 | Chemokine binding                           | -         |
| 3. Truncated in CPXV      |         |                                             |           |
| AKMV009                   | CPXV012 | Similar to Clr-B, inhibits NK cell function | [4]       |
| AKMV157                   | CPXV159 | Prevents virus-cell direct fusion with ATI  |           |
| AKMV198                   | CPXV203 | Disrupts MHCI trafficking to cell surface   | [5, 6]    |
| 4. Fragmented differently |         |                                             |           |
| AKMV027                   | CPXV031 | -                                           | -         |
| AKMV028                   | CPXV032 | Similar to C5L, Kelch-containing protein    | -         |
| AKMV200                   | CPXV205 | B11 family                                  | -         |

## References

1. Kochneva, G.; Kolosova, I.; Maksyutova, T.; Ryabchikova, E.; Shchelkunov, S., Effects of deletions of kelch-like genes on cowpox virus biological properties. *Archives of virology* **2005**, 150, (9), 1857-70.
2. Alejo, A.; Ruiz-Arguello, M. B.; Ho, Y.; Smith, V. P.; Saraiva, M.; Alcamí, A., A chemokine-binding domain in the tumor necrosis factor receptor from variola (smallpox) virus. *Proceedings of the National Academy of Sciences of the United States of America* **2006**, 103, (15), 5995-6000.
3. Loparev, V. N.; Parsons, J. M.; Knight, J. C.; Panus, J. F.; Ray, C. A.; Buller, R. M.; Pickup, D. J.; Esposito, J. J., A third distinct tumor necrosis factor receptor of orthopoxviruses. *Proceedings of the National Academy of Sciences of the United States of America* **1998**, 95, (7), 3786-91.
4. Luteijn, R. D.; Hoelen, H.; Kruse, E.; van Leeuwen, W. F.; Grootens, J.; Horst, D.; Koorengevel, M.; Drijfhout, J. W.; Kremmer, E.; Fruh, K.; Neefjes, J. J.; Killian, A.; Lebbink, R. J.; Rensing, M. E.; Wiertz, E. J., Cowpox virus protein CPXV012 eludes CTLs by blocking ATP binding to TAP. *Journal of immunology* **2014**, 193, (4), 1578-89.
5. McCoy, W. H. t.; Wang, X.; Yokoyama, W. M.; Hansen, T. H.; Fremont, D. H., Structural mechanism of ER retrieval of MHC class I by cowpox. *PLoS biology* **2012**, 10, (11), e1001432.
6. McCoy, W. H. t.; Wang, X.; Yokoyama, W. M.; Hansen, T. H.; Fremont, D. H., Cowpox virus employs a two-pronged strategy to outflank MHCI antigen presentation. *Mol Immunol* **2013**, 55, (2), 156-8.
