# Supplementary material for: Genome Sequences of Akhmeta Virus, an Early Divergent Old World Orthopoxvirus
Source: MDPI journal article supplement (doi:10.3390/v10050252), 2018-05-12
Supplement: s1 [file s1]

**Table S1.** Strains used in this study

| Species          | Strain                                | Abbreviation    | Accession # | Size    | Reference  |
|------------------|---------------------------------------|-----------------|-------------|---------|------------|
| Akhmeta virus    | Akhmeta2013-85                        | AKMV_AKHM13-85  |             | 221,911 | This study |
| Akhmeta virus    | Akhmeta2013-88                        | AKMV_AKHM13-88  |             | 221,902 | This study |
| Akhmeta virus    | Vani2010                              | AkMV_VANI10     |             | 217,740 | This study |
| Cowpox virus     | GRI-90                                | CPXV_GRI-90     | X94355.2    | 223,666 | [1]        |
| Cowpox virus     | Brighton Red                          | CPXV_BR         | NC_003660.2 | 224,499 | [2]        |
| Cowpox virus     | Germany 91-3                          | CPXV_GER91      | DQ437593.1  | 228,250 | [3]        |
| Cowpox virus     | Austria 1999                          | CPXV_AUS99      | HQ407377.1  | 221,512 | [4]        |
| Cowpox virus     | HumGra07/1                            | CPXV_HumGra08/2 | KC813510.1  | 220,071 | [5]        |
| Cowpox virus     | RatKre08/2                            | CPXV_RatKre08/2 | KC813505.1  | 221,194 | [5]        |
| Cowpox virus     | JagKre08/1                            | CPXV_JagKre08/1 | KC813497.1  | 216,415 | [5]        |
| Cowpox virus     | HumMag07/1                            | CPXV_HumMag07/1 | KC813495.1  | 217,406 | [5]        |
| Cowpox virus     | HumLit08/1                            | CPXV_HumLit08/1 | KC813493.1  | 215,715 | [5]        |
| Cowpox virus     | France_2001_Nancy                     | CPXV_FRA01      | HQ420894.1  | 226,424 | [4]        |
| Cowpox virus     | Germany_2002_MKY                      | CPXV_GER02      | HQ420898.1  | 222,555 | [4]        |
| Ectromelia virus | Moscow                                | ECTV_MOS        | NC_004105.1 | 209,771 | [6]        |
| Ectromelia virus | ERPV                                  | ECTV_ERPV       | JQ410350.1  | 206,527 | [7]        |
| Ectromelia virus | Naval                                 | ECTV_NAV        | KJ563295.1  | 207,428 | [8]        |
| Taterapox virus  | Dahomey 1968                          | TATV_DAH        | NC_008291.1 | 198,050 | [3]        |
| Camelpox virus   | CMS                                   | CMLV_CMS        | AY009089.1  | 202,205 | [9]        |
| Rabbitpox virus  | Rabbitpox Utrecht                     | RPXV_UTR        | AY484669.1  | 197,731 | [10]       |
| Horsepox virus   | MNR-76                                | HSPV_NMR76      | DQ792504    | 212,633 | [11]       |
| Monkeypox virus  | Congo_2003_358                        | MPXV_CNG03      | DQ011154.1  | 197,195 | [12]       |
| Monkeypox virus  | Liberia_1970_184                      | MPXV_LIB70      | DQ011156.1  | 200,256 | [12]       |
| Monkeypox virus  | Zaire-96-I-16                         | MPXV_ZAI96      | NC_003310.1 | 196,858 | [12]       |
| Vaccinia virus   | Lister clone VACV107                  | VACV_LIST107    | DQ121394.1  | 189,421 | [13]       |
| Vaccinia virus   | Chorioallantois vaccinia virus Ankara | VACV_CVA        | AM501482.1  | 192,353 | [14]       |
| Vaccinia virus   | Acambis clone 2000                    | VACV_ACAM       | AY313847.1  | 199,234 | [15]       |
| Vaccinia virus   | Western Reserve                       | VACV_WR         | NC_006998   | 194,711 | [16]       |
| Variola virus    | Brazil 1966                           | VARV_BRZ66      | DQ441419.1  | 188,062 | [3]        |
| Variola virus    | Bangladesh 1974                       | VARV_BSH74      | DQ441420.1  | 186,293 | [3]        |
| Variola virus    | China Horn 1948                       | VARV_CHN48      | DQ437582.1  | 186,668 | [3]        |
| Raccoonpox virus | Herman                                | RCNV_HRM        | NC_027213.1 | 214,699 | [17]       |
| Skunkpox virus   | WA                                    | SKPV_WA         | KU749310.1  | 222,832 | [18]       |
| Volepox virus    | CA                                    | VPXV_CA         | KU749311.1  | 217,124 | [18]       |

## References

1. Shchelkunov, S. N.; Safronov, P. F.; Totmenin, A. V.; Petrov, N. A.; Ryazankina, O. I.; Gutorov, V. V.; Kotwal, G. J., The genomic sequence analysis of the left and right species-specific terminal region of a cowpox virus strain reveals unique sequences and a cluster of intact ORFs for immunomodulatory and host range proteins. *Virology* **1998**, 243, (2), 432-60.
2. Pickup, D. J.; Bastia, D.; Stone, H. O.; Joklik, W. K., Sequence of terminal regions of cowpox virus DNA: arrangement of repeated and unique sequence elements. *Proceedings of the National Academy of Sciences of the United States of America* **1982**, 79, (23), 7112-6.
3. Esposito, J. J.; Sammons, S. A.; Frace, A. M.; Osborne, J. D.; Olsen-Rasmussen, M.; Zhang, M.; Govil, D.; Damon, I. K.; Kline, R.; Laker, M.; Li, Y.; Smith, G. L.; Meyer, H.; Leduc, J. W.; Wohlhueter, R. M., Genome sequence diversity and clues to the evolution of variola (smallpox) virus. *Science* **2006**, 313, (5788), 807-12.
4. Carroll, D. S.; Emerson, G. L.; Li, Y.; Sammons, S.; Olson, V.; Frace, M.; Nakazawa, Y.; Czerny, C. P.; Tryland, M.; Kolodziejek, J.; Nowotny, N.; Olsen-Rasmussen, M.; Khristova, M.; Govil, D.; Karem, K.; Damon, I. K.; Meyer, H., Chasing Jenner's vaccine: revisiting cowpox virus classification. *PloS one* **2011**, 6, (8), e23086.
5. Dabrowski, P. W.; Radonic, A.; Kurth, A.; Nitsche, A., Genome-wide comparison of cowpox viruses reveals a new clade related to Variola virus. *PloS one* **2013**, 8, (12), e79953.
6. Chen, N.; Danila, M. I.; Feng, Z.; Buller, R. M.; Wang, C.; Han, X.; Lefkowitz, E. J.; Upton, C., The genomic sequence of ectromelia virus, the causative agent of mousepox. *Virology* **2003**, 317, (1), 165-86.
7. Mendez-Rios, J. D.; Martens, C. A.; Bruno, D. P.; Porcella, S. F.; Zheng, Z. M.; Moss, B., Genome sequence of erythromelalgia-related poxvirus identifies it as an ectromelia virus strain. *PloS one* **2012**, 7, (4), e34604.
8. Mavian, C.; Lopez-Bueno, A.; Bryant, N. A.; Seeger, K.; Quail, M. A.; Harris, D.; Barrell, B.; Alcamí, A., The genome sequence of ectromelia virus Naval and Cornell isolates from outbreaks in North America. *Virology* **2014**, 462-463, 218-26.
9. Gubser, C.; Smith, G. L., The sequence of camelpox virus shows it is most closely related to variola virus, the cause of smallpox. *The Journal of general virology* **2002**, 83, (Pt 4), 855-72.
10. Li, G.; Chen, N.; Roper, R. L.; Feng, Z.; Hunter, A.; Danila, M.; Lefkowitz, E. J.; Buller, R. M.; Upton, C., Complete coding sequences of the rabbitpox virus genome. *The Journal of general virology* **2005**, 86, (Pt 11), 2969-77.
11. Tulman, E. R.; Delhon, G.; Afonso, C. L.; Lu, Z.; Zsak, L.; Sandybaev, N. T.; Kerembekova, U. Z.; Zaitsev, V. L.; Kutish, G. F.; Rock, D. L., Genome of horsepox virus. *Journal of virology* **2006**, 80, (18), 9244-58.
12. Likos, A. M.; Sammons, S. A.; Olson, V. A.; Frace, A. M.; Li, Y.; Olsen-Rasmussen, M.; Davidson, W.; Galloway, R.; Khristova, M. L.; Reynolds, M. G.; Zhao, H.; Carroll, D. S.; Curns, A.; Formenty, P.; Esposito, J. J.; Regnery, R. L.; Damon, I. K., A tale of two clades: monkeypox viruses. *The Journal of general virology* **2005**, 86, (Pt 10), 2661-72.
13. Garcel, A.; Crance, J. M.; Drillien, R.; Garin, D.; Favier, A. L., Genomic sequence of a clonal isolate of the vaccinia virus Lister strain employed for smallpox vaccination in France and its comparison to other orthopoxviruses. *The Journal of general virology* **2007**, 88, (Pt 7), 1906-16.
14. Meisinger-Henschel, C.; Schmidt, M.; Lukassen, S.; Linke, B.; Krause, L.; Konietzny, S.; Goesmann, A.; Howley, P.; Chaplin, P.; Suter, M.; Hausmann, J., Genomic sequence of

chorioallantois vaccinia virus Ankara, the ancestor of modified vaccinia virus Ankara. *The Journal of general virology* **2007**, 88, (Pt 12), 3249-59.

15. Osborne, J. D.; Da Silva, M.; Frace, A. M.; Sammons, S. A.; Olsen-Rasmussen, M.; Upton, C.; Buller, R. M.; Chen, N.; Feng, Z.; Roper, R. L.; Liu, J.; Pougatcheva, S.; Chen, W.; Wohlhueter, R. M.; Esposito, J. J., Genomic differences of Vaccinia virus clones from Dryvax smallpox vaccine: the Dryvax-like ACAM2000 and the mouse neurovirulent Clone-3. *Vaccine* **2007**, 25, (52), 8807-32.
16. Goebel, S. J.; Johnson, G. P.; Perkus, M. E.; Davis, S. W.; Winslow, J. P.; Paoletti, E., The complete DNA sequence of vaccinia virus. *Virology* **1990**, 179, (1), 247-66, 517-63.
17. Fleischauer, C.; Upton, C.; Victoria, J.; Jones, G. J.; Roper, R. L., Genome Sequence and Comparative Virulence of Raccoonpox Virus: The First North American Poxvirus Sequence. *The Journal of general virology* **2015**.
18. Smithson, C.; Tang, N.; Sammons, S.; Frace, M.; Batra, D.; Li, Y.; Emerson, G. L.; Carroll, D. S.; Upton, C., The genomes of three North American orthopoxviruses. *Virus genes* **2016**.
