# Supplementary material for: Genome Sequences of Akhmeta Virus, an Early Divergent Old World Orthopoxvirus
Source: MDPI journal article supplement (doi:10.3390/v10050252), 2018-05-12
Supplement: s1 [file s1]

**Table S2.** Comparison of annotated genes in the ITR and terminal regions of AKMV\_AKHM13-88, CXPV\_BR, CPXV\_GRI-90, and ECTV\_MOS

| AKMV_AKHM13-88       |               |      | CPXV_BR |      |      | CPXV_GRI-90 |      |      | ECTV_MOS |      |     | Function                             |
|----------------------|---------------|------|---------|------|------|-------------|------|------|----------|------|-----|--------------------------------------|
| ORF                  | Position      | Size | ORF     | Size | Id % | ORF         | Size | Id % | ORF      | Size | Id% |                                      |
| ITR region           |               |      |         |      |      |             |      |      |          |      |     |                                      |
| -                    |               |      | CPXV001 |      |      | -           |      |      | -        |      |     | -                                    |
| -                    |               |      | CPXV002 |      |      | -           |      |      | -        |      |     | -                                    |
| AKMV001              | 1,923-2,675   | 251  | CPXV003 | 247  | 77   | D1L         | 255  | 83   | EVM001   | 248  | 81  | Chemokine binding protein            |
| -                    |               |      | CPXV004 | 72   |      | -           |      |      | -        |      |     | -                                    |
| AKMV002              | 2,794-3,840   | 349  | CPXV005 | 356  | 83   | D2L         | 351  | 88   | -        |      |     | TNF receptor                         |
| AKMV003              | 3,927-5,705   | 593  | CPXV006 | 620  | 83   | D3L         | 586  | 87   | EVM002   | 588  | 88  | Ankyrin                              |
| AKMV004              | 5,708-5,842   | 45   | CPXV007 | 51   | 51   | -           |      |      | -        |      |     | -                                    |
| AKMV005              | 5,961-7,976   | 672  | CPXV008 | 673  | 86   | D4L         | 672  | 86   | -        |      |     | Ankyrin                              |
| AKMV006              | 8,161-8,622   | 154  | CPXV009 | 154  | 92   | D5L         | 153  | 94   | -        |      |     | -                                    |
| -                    |               |      | -       |      |      | -           |      |      | EVM003   | 321  |     | CrmD                                 |
| Left terminal region |               |      |         |      |      |             |      |      |          |      |     |                                      |
| -                    |               |      | CPXV010 | 216  |      | D6L         | 219  |      | -        |      |     | Alpha-amanitin sensitivity protein   |
| AKMV007              | 9,215-10,036  | 274  | -       |      |      | D7L         | 274  | 91   | EVM004   | 273  | 90  | Kelch-like protein                   |
| AKMV008              | 10,119-12,098 | 660  | CPXV011 | 659  | 89   | D8L         | 662  | 90   | EVM005   | 651  | 88  | Ankyrin                              |
| AKMV009              | 12,131-12,610 | 154  | CPXV012 | 69   | 54   | D10L        | 97   | 86   | EVM007   | 104  | 84  | C-type Lectin, host immunity evasion |
| -                    |               |      | -       |      |      | D9L         | 76   |      | EVM006   | 76   |     | -                                    |
| -                    |               |      | CPXV013 | 524  |      | D11L        | 522  |      | -        |      |     | Kelch like                           |
| AKMV010              | 12,752-13,360 | 203  | CPXV014 | 203  | 90   | D12L        | 203  | 91   | EVM008   | 203  | 88  | TNF receptor                         |
| AKMV011              | 13,357-13,692 | 112  | CPXV015 | 111  | 88   | D13L        | 112  | 84   | EVM009   | 112  | 84  | -                                    |
| AKMV012              | 13,800-16,100 | 767  | CPXV016 | 765  | 80   | D14L        | 765  | 80   | EVM010   | 764  | 80  | Ankyrin                              |
| AKMV013              | 16,497-17,783 | 429  | CPXV017 | 436  | 78   | C1L         | 438  | 80   | -        |      |     | Ankyrin                              |
| AKMV014              | 17,906-18,439 | 178  | CPXV018 | 179  | 58   | C2L         | 179  | 79   | -        |      |     | -                                    |
| AKMV015              | 18,547-20,952 | 802  | CPXV019 | 797  | 71   | C3L         | 834  | 67   | -        |      |     | Ankyrin                              |
| AKMV016              | 21,060-21,566 | 169  | CPXV020 | 171  | 73   | C4L         | 171  | 75   | -        |      |     | -                                    |
| AKMV017              | 21,741-22,154 | 138  | CPXV021 | 140  | 78   | C5R         | 139  | 77   | -        |      |     | Similar to viral growth factor       |
| AKMV018              | 22,290-23,288 | 333  | CPXV022 | 332  | 84   | C6L         | 332  | 86   | EVM011   | 332  | 85  | IL-1 receptor antagonist             |
| AKMV019              | 23,830-24,573 | 248  | CPXV023 | 243  | 86   | C7R         | 243  | 86   | EVM012   | 242  | 82  | Ubiquitin ligase                     |
| AKMV020              | 24,743-25,144 | 134  | CPXV024 | 127  | 79   | C8L         | 125  | 89   | EVM013   | 139  | 79  | IL-18 binding protein                |
| AKMV021              | 25,175-27,193 | 673  | CPXV025 | 669  | 79   | C9L         | 669  | 80   | -        |      |     | Ankyrin                              |
| AKMV022              | 27,347-27,538 | 64   | CPXV026 | 64   | 90   | C10L        | 63   | 92   | EVM014   | 60   | 94  | -                                    |
| AKMV023              | 27,718-29,652 | 645  | CPXV027 | 633  | 84   | C11L        | 615  | 65   | -        |      |     | Ankyrin                              |
| AKMV024              | 29,693-30,247 | 185  | CPXV028 | 186  | 93   | C12L        | 183  | 93   | -        |      |     | -                                    |
| AKMV025              | 30,320-30,772 | 151  | CPXV029 | 151  | 94   | C13L        | 151  | 93   | EVM015   | 151  | 91  | Host-range factor                    |
| AKMV026              | 30,990-31,481 | 164  | CPXV030 | 156  | 84   | C14L        | 157  | 83   | EVM016   | 156  | 85  | -                                    |
| AKMV027              | 31,641-31,781 | 47   | CPXV031 | 70   | 69   | -           |      |      | -        |      |     | Kelch-like protein                   |
| AKMV028              | 31,799-32,251 | 151  | CPXV032 | 126  | 92   | C15L        | 206  | 90   | -        |      |     | Kelch-like protein                   |
| AKMV029              | 32,328-33,269 | 314  | CPXV033 | 317  | 82   | C16L        | 316  | 80   | -        |      |     | IL-1 receptor antagonist             |
| AKMV030              | 33,337-34,128 | 264  | CPXV034 | 264  | 84   | C17L        | 260  | 90   | EVM017   | 263  | 88  | Complement-binding protein           |
| AKMV031              | 34,185-35,723 | 513  | CPXV035 | 513  | 94   | C18L        | 513  | 94   | EVM018   | 513  | 92  | Kelch-like protein                   |
| AKMV032              | 35,790-36,488 | 233  | CPXV036 | 232  | 95   | C19L        | 232  | 96   | -        |      |     | Putative TLR signaling inhibitor     |
| AKMV033              | 36,466-36,819 | 118  | CPXV037 | 118  | 84   | Q1L         | 118  | 90   | EVM019   | 118  | 86  | NF-κB inhibitor                      |
| AKMV034              | 36,948-37,481 | 178  | CPXV038 | 178  | 86   | Q2L         | 176  | 91   | EVM020   | 178  | 89  | Alpha amanitin-sensitive protein     |
| AKMV035              | 37,523-38,863 | 447  | CPXV039 | 474  | 94   | P1L         | 475  | 96   | EVM021   | 473  | 96  | Ankyin-like protein                  |
| AKMV036              | 38,908-39,570 | 221  | CPXV040 | 221  | 96   | P2L         | 164  | 95   | -        |      |     | NF-κB inhibitor                      |
| AKMV037              | 39,702-40,556 | 285  | CPXV041 | 285  | 92   | M1L         | 285  | 93   | EVM022   | 286  | 93  | Ankyrin-like protein                 |
| AKMV038              | 40,746-41,867 | 374  | CPXV042 | 374  | 96   | M2L         | 374  | 95   | EVM023   | 374  | 93  | Serpin                               |
| AKMV039              | 41,917-42,183 | 89   | CPXV043 | 89   | 91   | M3L         | 89   | 86   | -        |      |     | IFN resistance                       |

|                       |                 |       |         |       |     |      |       |     |        |       |     |                                         |
|-----------------------|-----------------|-------|---------|-------|-----|------|-------|-----|--------|-------|-----|-----------------------------------------|
| AKMV040               | 42,244-43,518   | 425   | CPXV044 | 425   | 97  | M4L  | 425   | 97  | -      |       |     | Nicking/joining enzyme                  |
| AKMV041               | 43,545-44,378   | 278   | CPXV045 | 277   | 97  | M5L  | 277   | 98  | EVM024 | 278   | 97  | Monoglyceride lipase                    |
| AKMV042               | 44,518-44,967   | 150   | CPXV046 | 150   | 96  | M6R  | 162   | 94  | -      |       |     | Host immune response repressor          |
| AKMV043               | 44,997-45,164   | 56    | CPXV047 | 57    | 71  | -    |       |     | -      |       |     | -                                       |
| AKMV044               | 45,038-45,772   | 245   | CPXV048 | 252   | 85  | G1L  | 239   | 84  | EVM025 | 457   | 83  | Caspase-9 inhibitor                     |
| AKMV045               | 45,772-46,206   | 145   | CPXV049 | 148   | 99  | G2L  | 148   | 99  | EVM026 | 148   | 99  | dUTPase                                 |
| AKMV046               | 46,240-47,682   | 481   | CPXV050 | 481   | 94  | G3L  | 486   | 95  | EVM027 | 483   | 94  | Kelch-like protein                      |
| AKMV047               | 47,693-48,652   | 320   | CPXV051 | 334   | 97  | G4L  | 320   | 98  | EVM028 | 320   | 98  | Ribonuclease reductase S subunit        |
| AKMV048               | 48,685-49,653   | 323   | CPXV052 | 324   | 87  | G5L  | 324   | 90  | -      |       |     | Major Membrane protein                  |
| AKMV049               | 49,683-49,904   | 74    | CPXV053 | 72    | 77  | G6L  | 75    | 77  | EVM029 | 75    | 77  | -                                       |
| AKMV050               | 49,920-50,159   | 80    | CPXV054 | 82    | 79  | G7L  | 81    | 86  | EVM030 | 83    | 90  | -                                       |
| AKMV051               | 50,320-50,517   | 198   | CPXV055 | 198   | 97  | G8L  | 198   | 97  | EVM031 | 198   | 95  | -                                       |
| Right terminal region |                 |       |         |       |     |      |       |     |        |       |     |                                         |
| AKMV156               | 149,726-153,367 | 1,214 | CPXV158 | 1,284 | 72  | A26L | 1,279 | 72  | EVM128 | 1,113 | 68  | ATI protein                             |
| AKMV157               | 153,413-154,972 | 519   | CPXV159 | 192   | 87  | A27L | 519   | 88  | -      |       |     | Fragment of P4c                         |
| -                     |                 |       | CPXV160 | 69    |     | -    |       |     | -      |       |     | -                                       |
| -                     |                 |       | CPXV161 | 261   |     | -    |       |     | -      |       |     | Fragment of p4c                         |
| AKMV158               | 155,024-155,356 | 111   | CPXV162 | 111   | 96  | A28L | 111   | 97  | EVM129 | 111   | 95  | IMV surface protein                     |
| AKMV159               | 155,357-155,797 | 147   | CPXV163 | 147   | 97  | A29L | 147   | 99  | EVM130 | 147   | 97  | IMV membrane protein                    |
| AKMV160               | 155,798-156,715 | 306   | CPXV164 | 306   | 99  | A30L | 306   | 99  | EVM131 | 306   | 98  | RNA Pol RPO35 protein                   |
| AKMV161               | 156,678-156,911 | 78    | CPXV165 | 77    | 96  | A31L | 78    | 99  | EVM132 | 78    | 97  | IMV protein                             |
| AKMV162               | 157,071-157,454 | 128   | CPXV166 | 141   | 84  | A32R | 146   | 94  | EVM133 | 127   | 92  | Hypothetical protein                    |
| AKMV163               | 157,424-158,185 | 254   | CPXV167 | 312   | 100 | A33L | 301   | 100 | EVM134 | 270   | 100 | ATPase                                  |
| AKMV164               | 158,366-158,920 | 185   | CPXV168 | 188   | 94  | A34R | 186   | 95  | EVM135 | 186   | 88  | EEV membrane phosphoglycoprotein        |
| AKMV165               | 158,944-159,450 | 169   | CPXV169 | 169   | 99  | A35R | 169   | 99  | EVM136 | 169   | 96  | IEV and EEV membrane glycoprotein       |
| AKMV166               | 159,431-159,610 | 60    | CPXV170 | 62    | 93  | -    |       |     | -      |       |     | -                                       |
| AKMV167               | 159,495-160,025 | 177   | CPXV171 | 177   | 99  | A36R | 177   | 98  | EVM137 | 177   | 96  | Hypothetical protein                    |
| AKMV168               | 160,116-160,760 | 215   | CPXV172 | 225   | 93  | A37R | 224   | 95  | -      |       |     | IEV transmembrane phosphoprotein        |
| AKMV169               | 160,825-161,616 | 264   | CPXV173 | 264   | 95  | A38R | 269   | 95  | -      |       |     | Hypothetical protein                    |
| AKMV170               | 161,749-161,913 | 55    | CPXV174 | 64    | 91  | A39R | 65    | 93  | -      |       |     | Hypothetical protein                    |
| AKMV171               | 161,910-162,743 | 278   | CPXV175 | 278   | 97  | A40L | 278   | 96  | EVM138 | 278   | 95  | CD47-like protein                       |
| AKMV172               | 162,759-163,955 | 399   | CPXV176 | 410   | 93  | A41R | 403   | 94  | EVM139 | 400   | 94  | Semaphorin                              |
| AKMV173               | 163,982-164,503 | 174   | CPXV177 | 161   | 81  | A42R | 166   | 81  | -      |       |     | Secreted glycoprotein                   |
| AKMV174               | 164,618-165,280 | 221   | CPXV178 | 219   | 77  | A43L | 220   | 78  | EVM140 | 224   | 76  | -                                       |
| AKMV175               | 165,462-165,863 | 134   | CPXV179 | 134   | 85  | A44R | 134   | 87  | EVM141 | 135   | 87  | Profilin-like protein                   |
| AKMV176               | 165,907-166,515 | 203   | CPXV180 | 195   | 70  | A45R | 197   | 69  | EVM142 | 212   | 88  | Putative Type-1 membrane glycoprotein   |
| AKMV177               | 166,534-166,761 | 76    | CPXV181 | 82    | 83  | A46R | 79    | 78  | -      |       |     | Hypothetical protein                    |
| AKMV178               | 166,886-167,920 | 345   | CPXV182 | 346   | 94  | A47L | 347   | 95  | EVM143 | 347   | 93  | 3 $\beta$ -Hydroxysteroid dehydrogenase |
| AKMV179               | 167,968-168,345 | 126   | CPXV183 | 126   | 96  | A48R | 126   | 97  | EVM144 | 126   | 97  | Cu-Zn superoxide dismutase-like protein |
| AKMV180               | 168,335-169,057 | 241   | CPXV184 | 243   | 93  | A49R | 241   | 95  | EVM145 | 241   | 95  | TIR like protein                        |
| AKMV181               | 169,158-169,892 | 245   | CPXV185 | 245   | 94  | A50L | 245   | 96  | EVM146 | 245   | 94  | Hypothetical protein                    |
| AKMV182               | 169,991-170,605 | 205   | CPXV186 | 228   | 98  | A51R | 228   | 97  | EVM147 | 228   | 96  | Thymidylate kinase                      |
| AKMV183               | 170,654-171,142 | 163   | CPXV187 | 163   | 93  | A52R | 163   | 93  | -      |       |     | Putative phosphotransferase protein     |
| AKMV184               | 171,174-172,838 | 555   | CPXV188 | 555   | 97  | A53R | 553   | 96  | EVM148 | 555   | 98  | DNA ligase                              |
| AKMV185               | 172,905-173,909 | 335   | CPXV189 | 335   | 95  | A54R | 335   | 96  | EVM149 | 335   | 95  | Hypothetical protein                    |
| AKMV186               | 173,979-174,563 | 195   | CPXV190 | 191   | 87  | A55R | 191   | 86  | -      |       |     | TIR like protein                        |
| AKMV187               | 174,913-175,467 | 185   | CPXV191 | 187   | 77  | A56R | 187   | 76  | -      |       |     | Soluble TNF receptor CrmC               |
| -                     |                 |       | CPXV192 | 51    |     | -    |       |     | -      |       |     | Ankyrin                                 |
| AKMV188               | 175,708-177,402 | 565   | CPXV193 | 564   | 94  | A57R | 565   | 94  | EVM150 | 564   | 94  | Kelch-like protein                      |
| AKMV189               | 177,452-178,393 | 314   | CPXV194 | 298   | 81  | A58R | 315   | 86  | EVM151 | 282   | 81  | Haemagglutinin                          |
| AKMV190               | 178,410-179,003 | 198   | CPXV195 | 198   | 99  | A59R | 198   | 99  | -      |       |     | Guanylate kinase                        |
| AKMV191               | 179,144-180,046 | 301   | CPXV196 | 300   | 95  | B1R  | 301   | 95  | EVM152 | 300   | 94  | Ser/Thr Protein kinase                  |
| AKMV192               | 180,139-181,653 | 505   | CPXV197 | 506   | 82  | B2R  | 504   | 84  | EVM153 | 504   | 82  | Schlafen-like protein                   |

|            |                 |       |         |       |    |      |       |    |        |     |     |                                     |
|------------|-----------------|-------|---------|-------|----|------|-------|----|--------|-----|-----|-------------------------------------|
| AKMV193    | 181,885-183,555 | 557   | CPXV198 | 559   | 93 | B3R  | 559   | 94 | EVM154 | 565 | 93  | Ankyrin                             |
| AKMV194    | 183,659-184,612 | 318   | CPXV199 | 318   | 91 | B4R  | 318   | 94 | EVM155 | 318 | 93  | EEV membrane glycoprotein           |
| AKMV195    | 184,701-185,231 | 177   | CPXV200 | 180   | 87 | B5R  | 184   | 95 | EVM156 | 178 | 98  | Ankyrin                             |
| AKMV196    | 185,270-185,815 | 182   | CPXV201 | 182   | 92 | B6R  | 183   | 97 | EVM157 | 182 | 99  | Hypothetical protein                |
| AKMV197    | 185,893-186,693 | 267   | CPXV202 | 267   | 92 | B7R  | 272   | 93 | EVM158 | 267 | 99  | Interferon-gamma receptor           |
| AKMV198    | 186,835-187,581 | 249   | CPXV203 | 226   | 84 | B8R  | 222   | 66 | -      |     |     | Intracellular Viral protein         |
| AKMV199    | 187,715-189,220 | 502   | CPXV204 | 502   | 90 | B9R  | 502   | 90 | -      |     |     | Kelch-like protein                  |
| AKMV200    | 189,291-189,578 | 96    | CPXV205 | 91    | 93 | B10R | 106   | 96 | EVM159 | 88  | 91  | Hypothetical protein                |
| AKMV201    | 189,645-190,502 | 286   | CPXV206 | 286   | 95 | B11R | 284   | 94 | EVM160 | 287 | 99  | Ser/Thr Protein kinase              |
| AKMV202    | 190,593-191,627 | 345   | CPXV207 | 342   | 90 | B12R | 346   | 95 | EVM161 | 345 | 96  | Serpin                              |
| AKMV203    | 191,754-192,203 | 150   | CPXV208 | 150   | 95 | B13R | 150   | 97 | EVM162 | 165 | 100 | Hypothetical protein                |
| AKMV204    | 192,290-193,276 | 329   | CPXV209 | 327   | 84 | B14R | 327   | 84 | EVM163 | 329 | 98  | IL-1 $\beta$ receptor               |
| AKMV205    | 193,331-194,338 | 336   | CPXV210 | 341   | 92 | B15L | 341   | 90 | EVM164 | 341 | 96  | Hypothetical protein                |
| AKMV206    | 194,503-196,230 | 576   | CPXV211 | 575   | 91 | B16R | 575   | 96 | EVM165 | 595 | 95  | Ankyrin                             |
| AKMV207    | 196,301-197,359 | 353   | CPXV212 | 367   | 83 | B17R | 352   | 87 | EVM166 | 359 | 84  | IFN- $\alpha/\beta$ binding protein |
| AKMV208    | 197,440-199,833 | 798   | CPXV213 | 801   | 87 | B18R | 796   | 91 | -      |     |     | Ankyrin                             |
| -          |                 |       | CPXV214 | 51    |    | -    |       |    | -      |     |     | Unknown                             |
| AKMV209    | 199,940-201,619 | 560   | CPXV215 | 558   | 78 | B19R | 558   | 79 | EVM167 | 560 | 99  | Kelch like                          |
| -          |                 |       | CPXV216 | 52    |    | -    |       |    | -      |     |     | Unknown                             |
| AKMV210    | 201,927-203,009 | 361   | CPXV217 | 373   | 89 | B20R | 376   | 89 | EVM168 | 371 | 90  | Serpin                              |
| AKMV211    | 203,213-203,431 | 72    | CPXV218 | 197   | 70 | B21R | 197   | 72 | -      |     |     | Hypothetical protein                |
| AKMV212    | 204,013-209,790 | 1,926 | CPXV219 | 1,920 | 80 | B22R | 1,934 | 80 | -      |     |     | Surface Glycoprotein                |
| AKMV213    | 210,043-211,785 | 581   | CPXV220 | 580   | 94 | K1R  | 582   | 97 | -      |     |     | -                                   |
| -          |                 |       | CPXV221 | 322   |    | -    |       |    | -      |     |     | CrmD                                |
| AKMV214    | 212,581-213,072 | 164   | -       |       |    | K3R  | 168   | 92 | -      |     |     | Receptor for host TNF/chemokines    |
| -          |                 |       | -       |       |    | T1R  | 211   |    | -      |     |     | -                                   |
| <hr/>      |                 |       |         |       |    |      |       |    |        |     |     |                                     |
| ITR region |                 |       |         |       |    |      |       |    |        |     |     |                                     |
| -          |                 |       | -       |       |    | -    |       |    | EVM003 | 321 |     | CrmD                                |
| AKMV215    | 213,302-213,763 | 154   | CPXV222 | 154   | 92 | I1R  | 153   | 94 | -      |     |     | -                                   |
| AKMV216    | 213,948-215,963 | 672   | CPXV223 | 675   | 86 | I2R  | 672   | 86 | -      |     |     | -                                   |
| AKMV217    | 216,082-216,216 | 45    | CPXV224 | 51    | 51 | -    |       |    | -      |     |     | -                                   |
| AKMV218    | 216,228-217,997 | 590   | CPXV225 | 620   | 83 | I3R  | 586   | 87 | EVM002 | 588 | 88  | -                                   |
| AKMV219    | 218,084-219,130 | 349   | CPXV226 | 356   | 83 | I4R  | 351   | 88 | -      |     |     | Soluble TNF receptor                |
| AKMV220    | 219,249-220,001 | 251   | CPXV227 | 247   | 77 | I5R  | 255   | 83 | EVM001 | 248 | 81  | Chemokine binding protein           |
| -          |                 |       | CPXV228 | 66    |    | -    |       |    | -      |     |     | -                                   |
| -          |                 |       | CPXV229 | 65    |    | -    |       |    | -      |     |     | -                                   |

-, no gene annotation or unknown function; Id %, amino acid identity reported in Blast analysis; EEV, extracellular enveloped virion; IEV, intracellular enveloped virion; IMV, intracellular mature virion; IL, interleukin; NF- $\kappa$ B, nuclear factor kappa-light chain enhancer of activated B cells; TNF, tumor necrosis factor; TLR, toll-like receptor; IFN- $\gamma$ , interferon gamma; Serpin, serine proteinase inhibitor.
