# Supplementary material for: Genome Sequences of Akhmeta Virus, an Early Divergent Old World Orthopoxvirus
Source: MDPI journal article supplement (doi:10.3390/v10050252), 2018-05-12
Supplement: s1 [file s1]

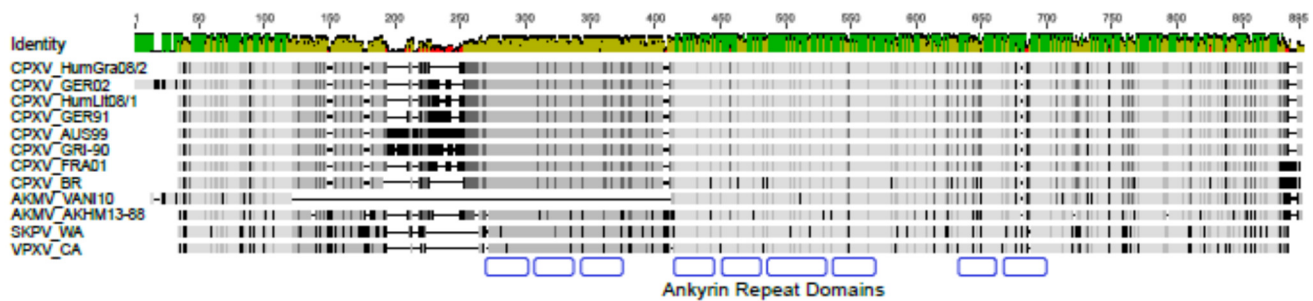

**Figure S2.** Amino acid alignment of CPXV\_GRI-90 C3L homologs from representative OPXVs. AKMV\_VANI10 exhibited a large deletion spanning three ankyrin repeat domains. Sequence identity and position are shown above (100% green, at least 30% and under 100% greeny-brown, under 30% red). Shaded bars indicate amino acid similarity based on BLOSUM62 (100% light gray, 80-100% medium gray, 60-80% dark gray, less than 60% black). Alignment gaps are shown by horizontal lines. Location of predicted ankyrin repeat domains are shown with blue boxes below.
