# Supplementary material for: Genome Sequences of Akhmeta Virus, an Early Divergent Old World Orthopoxvirus
Source: MDPI journal article supplement (doi:10.3390/v10050252), 2018-05-12
Supplement: s1 [file s1]

**Table S3.** Comparison of annotated genes in the highly conserved central region of AKMV\_AKHM13-88, CXPV\_BR, CPXV\_GRI-90, and ECTV\_MOS

| AKMV_AKHM13-88           |               |       | CPXV_BR  |       |      | CPXV_GRI-90 |       |      | ECTV_MOS |       |     | Functions                              |
|--------------------------|---------------|-------|----------|-------|------|-------------|-------|------|----------|-------|-----|----------------------------------------|
| ORF                      | Position      | Size  | ORF      | Size  | Id % | ORF         | Size  | Id % | ORF      | Size  | Id% |                                        |
| Conserved central region |               |       |          |       |      |             |       |      |          |       |     |                                        |
| AKMV052                  | 50,577-51,215 | 213   | CPXV056  | 213   | 96   | G9L         | 213   | 98   | EVM032   | 213   | 98  | S-S bond formation pathway protein     |
| AKMV053                  | 51,202-52,521 | 440   | CPXV057  | 440   | 99   | G10L        | 440   | 99   | EVM033   | 440   | 99  | Ser/Thr kinase                         |
| AKMV054                  | 52,500-52,736 | 79    | CPXV058  | 86    | 99   | -           |       |      | -        |       |     | -                                      |
| AKMV055                  | 52,544-53,608 | 355   | CPXV059  | 355   | 97   | G11L        | 355   | 97   | EVM034   | 355   | 96  | -                                      |
| AKMV056                  | 53,667-55,577 | 637   | CPXV060  | 635   | 95   | G12L        | 635   | 95   | EVM035   | 635   | 95  | IEV maturation protein                 |
| AKMV057                  | 55,610-56,728 | 373   | CPXV061  | 373   | 98   | G13L        | 373   | 98   | EVM036   | 373   | 98  | EEV phospholipase                      |
| AKMV058                  | 56,746-56,973 | 76    | CPXV062  | 74    | 80   | G14L        | 74    | 69   | EVM037   | 72    | 75  | -                                      |
| AKMV059                  | 57,024-57,173 | 50    | -        |       |      | -           |       |      | -        |       |     | -                                      |
| AKMV060                  | 57,245-57,688 | 148   | CPXV064  | 159   | 97   | G15L        | 159   | 99   | EVM038   | 159   | 99  | -                                      |
| AKMV061                  | 57,728-58,423 | 232   | CPXV065  | 232   | 94   | G16L        | 232   | 95   | EVM039   | 232   | 94  | -                                      |
| AKMV062                  | 58,486-58,791 | 102   | CPXV066  | 102   | 98   | G17R        | 102   | 100  | EVM040   | 102   | 97  | DNA-binding virion core protein        |
| AKMV063                  | 58,788-60,227 | 480   | CPXV067  | 480   | 98   | F1L         | 480   | 99   | EVM041   | 480   | 98  | Poly(A) polymerase large subunit       |
| AKMV064                  | 60,224-62,437 | 738   | CPXV068  | 738   | 98   | F2L         | 738   | 98   | EVM042   | 738   | 97  | -                                      |
| AKMV065                  | 62,548-63,120 | 191   | CPXV069  | 191   | 94   | F3L         | 191   | 95   | EVM043   | 191   | 93  | Interferon resistance/PKR inhibitor    |
| AKMV066                  | 63,177-63,956 | 260   | CPXV070  | 262   | 98   | F4L         | 260   | 99   | EVM044   | 260   | 99  | RNA polymerase subunit                 |
| AKMV067                  | 64,074-65,039 | 322   | CPXV071  | 320   | 80   | F5R         | 332   | 80   | EVM045   | 332   | 80  | -                                      |
| AKMV068                  | 65,251-66,954 | 568   | CPXV072  | 568   | 96   | F6R         | 568   | 95   | EVM046   | 568   | 94  | -                                      |
| AKMV069                  | 67,046-67,549 | 168   | CPXV073  | 166   | 87   | F7R         | 167   | 88   | EVM047   | 166   | 87  | Putative myristoylated protein         |
| AKMV070                  | 67,654-68,475 | 274   | CPXV074  | 274   | 99   | F8R         | 274   | 98   | EVM048   | 274   | 97  | -                                      |
| AKMV071                  | 68,481-71,513 | 1,011 | CPXV075  | 1,006 | 98   | F9L         | 1,007 | 97   | EVM049   | 1,007 | 97  | DNA polymerase                         |
| AKMV072                  | 71,545-71,835 | 97    | CPXV076  | 96    | 93   | F10R        | 96    | 93   | EVM050   | 96    | 92  | Sulfhydryl oxidase                     |
| AKMV073                  | 71,830-72,219 | 130   | CPXV077  | 130   | 93   | F11L        | 130   | 95   | EVM051   | 130   | 90  | Putative virion core protein           |
| AKMV074                  | 72,206-74,200 | 665   | CPXV078  | 667   | 90   | R1L         | 667   | 90   | EVM052   | 667   | 90  | -                                      |
| AKMV075                  | 74,216-74,404 | 63    | CPXV078A | 63    | 94   | -           |       |      | -        |       |     | -                                      |
| AKMV076                  | 74,254-74,580 | 109   | CPXV079  | 109   | 98   | R2L         | 109   | 99   | EVM053   | 109   | 97  | Glutaredoxin                           |
| AKMV077                  | 74,726-75,664 | 313   | CPXV080  | 313   | 99   | L1L         | 313   | 99   | EVM054   | 313   | 98  | Putative DNA-binding protein           |
| AKMV078                  | 75,671-75,895 | 75    | CPXV081  | 74    | 92   | L2L         | 74    | 93   | EVM055   | 74    | 93  | IMV membrane protein                   |
| AKMV079                  | 75,896-76,705 | 270   | CPXV082  | 269   | 97   | L3L         | 270   | 97   | EVM056   | 270   | 97  | DNA-binding phosphoprotein             |
| AKMV080                  | 76,790-79,105 | 772   | CPXV083  | 772   | 97   | L4L         | 772   | 97   | EVM057   | 772   | 97  | Ribonucleotide reductase large subunit |
| AKMV081                  | 79,133-79,372 | 80    | CPXV084  | 80    | 98   | L5L         | 80    | 99   | EVM058   | 80    | 99  | IMV protein                            |
| AKMV082                  | 79,391-80,539 | 383   | CPXV085  | 383   | 98   | L6L         | 383   | 98   | EVM059   | 383   | 97  | Telomere binding protein               |
| AKMV083                  | 80,532-81,803 | 424   | CPXV086  | 424   | 97   | L7L         | 424   | 97   | EVM060   | 424   | 97  | Viral core cysteine proteinase         |
| AKMV084                  | 81,809-83,842 | 678   | CPXV087  | 677   | 94   | L8R         | 677   | 94   | EVM061   | 677   | 95  | RNA helicase NPH-II                    |
| AKMV085                  | 83,846-85,576 | 577   | CPXV088  | 592   | 97   | H1L         | 592   | 97   | EVM062   | 592   | 97  | Putative metalloprotease               |
| AKMV086                  | 85,618-85,953 | 112   | CPXV089  | 112   | 94   | H2L         | 112   | 95   | EVM063   | 112   | 94  | Virus fusion complex                   |
| AKMV087                  | 85,947-86,609 | 221   | CPXV090  | 221   | 96   | H3R         | 221   | 96   | EVM064   | 221   | 95  | Late Transcriptional factor            |
| AKMV088                  | 86,579-86,953 | 125   | CPXV091  | 125   | 99   | H4L         | 125   | 99   | EVM065   | 125   | 100 | Glutaredoxin-like protein              |
| AKMV089                  | 86,956-88,254 | 433   | CPXV092  | 435   | 92   | H5R         | 435   | 92   | EVM066   | 435   | 92  | -                                      |
| AKMV090                  | 88,262-88,453 | 64    | CPXV093  | 64    | 100  | H6R         | 64    | 100  | EVM067   | 64    | 100 | RNA polymerase                         |

|         |                 |       |          |       |     |      |       |     |        |       |     |                                      |
|---------|-----------------|-------|----------|-------|-----|------|-------|-----|--------|-------|-----|--------------------------------------|
| AKMV091 | 88,455-88,931   | 159   | CPXV094  | 168   | 94  | H7R  | 166   | 94  | EVM068 | 166   | 94  | NLPc/P60 superfamily protein         |
| AKMV092 | 88,917-90,032   | 372   | CPXV095  | 372   | 99  | H8L  | 372   | 98  | EVM069 | 372   | 98  | Putative virion core protein         |
| AKMV093 | 89,993-90,211   | 73    | CPXV096  | 70    | 100 | -    | -     | -   | -      | -     | -   | -                                    |
| AKMV094 | 90,063-90,845   | 261   | CPXV097  | 261   | 100 | H9R  | 261   | 100 | EVM070 | 261   | 100 | Late transcription factor VLTF-1     |
| AKMV095 | 90,873-91,895   | 341   | CPXV098  | 341   | 95  | H10R | 341   | 95  | EVM071 | 341   | 96  | Entry fusion complex protein         |
| AKMV096 | 91,896-92,648   | 251   | CPXV099  | 251   | 99  | N1R  | 251   | 100 | EVM072 | 251   | 99  | IMV membrane protein                 |
| AKMV097 | 92,680-92,943   | 88    | CPXV100  | 87    | 90  | N2R  | 93    | 93  | EVM073 | 88    | 93  | Crescent formation                   |
| AKMV098 | 92,933-93,994   | 354   | CPXV101  | 351   | 95  | N3L  | 351   | 95  | EVM074 | 347   | 94  | Internal virion protein              |
| AKMV099 | 94,019-94,774   | 252   | CPXV102  | 252   | 100 | N4R  | 252   | 100 | EVM075 | 252   | 99  | DNA-binding virion core protein      |
| AKMV100 | 94,784-95170    | 129   | CPXV103  | 128   | 98  | N5R  | 128   | 98  | EMV076 | 128   | 98  | IMV entry and fusion protein         |
| AKMV101 | 95,154-95,588   | 145   | CPXV104  | 153   | 98  | S1R  | 154   | 98  | EVM077 | 154   | 98  | Virion protein                       |
| AKMV102 | 95,604-96,137   | 178   | CPXV105  | 178   | 95  | S2R  | 178   | 97  | EVM078 | 178   | 96  | Thymidine kinase                     |
| AKMV103 | 96,234-97,205   | 324   | CPXV106  | 334   | 99  | O1R  | 334   | 99  | EVM079 | 334   | 99  | Poly(A) polymerase small subunit     |
| AKMV104 | 97,120-97,677   | 186   | CPXV107  | 186   | 100 | O2R  | 186   | 99  | EVM080 | 186   | 99  | Poly(A) polymerase small subunit     |
| AKMV105 | 97,853-98,254   | 134   | CPXV108  | 134   | 96  | O3L  | 134   | 97  | EVM081 | 134   | 96  | membrane protein                     |
| AKMV106 | 98,360-102,220  | 1,287 | CPXV109  | 1,287 | 99  | O4R  | 1,287 | 99  | EVM082 | 1,287 | 99  | RNA polymerase subunit               |
| AKMV107 | 102,217-102,732 | 172   | CPXV110  | 172   | 99  | J1L  | 172   | 100 | EVM083 | 172   | 99  | Try/Ser phosphatase                  |
| AKMV108 | 102,746-103,315 | 190   | CPXV111  | 190   | 98  | J2R  | 190   | 98  | EVM084 | 190   | 97  | Putative viral membrane protein      |
| AKMV109 | 103,318-104,292 | 325   | CPXV112  | 326   | 96  | J3L  | 325   | 96  | EVM085 | 325   | 94  | Late transcription factor VLTF-4     |
| AKMV110 | 104,293-106,680 | 796   | CPXV113  | 796   | 98  | J4L  | 796   | 99  | EVM086 | 795   | 98  | RNA polymerase-associated protein    |
| AKMV111 | 106,866-107,492 | 209   | CPXV114  | 207   | 92  | J5R  | 213   | 96  | EVM087 | 213   | 91  | Late transcription factor 4 (VLTF-4) |
| AKMV112 | 107,493-108,437 | 315   | CPXV115  | 315   | 97  | J6R  | 315   | 97  | EVM088 | 315   | 97  | DNA topoisomerase Type I             |
| AKMV113 | 108,393-108,593 | 67    | CPXV116  | 61    | 92  | -    | -     | -   | -      | -     | -   | -                                    |
| AKMV114 | 108,481-108,915 | 145   | CPXV117  | 147   | 94  | J7R  | 147   | 94  | EVM089 | 147   | 92  | -                                    |
| AKMV115 | 108,959-111,487 | 843   | CPXV118  | 845   | 96  | E1R  | 845   | 96  | EVM090 | 844   | 96  | mRNA capping enzyme large subunit    |
| AKMV116 | 111,446-111,886 | 147   | CPXV119  | 147   | 97  | E2L  | 147   | 97  | EVM091 | 147   | 95  | Virion core protein                  |
| -       | -               | -     | CPXV119A | 80    | -   | -    | -     | -   | -      | -     | -   | -                                    |
| AKMV117 | 111,879-112,592 | 238   | CPXV120  | 238   | 97  | E3R  | 238   | 97  | EVM092 | 238   | 96  | Virion core protein                  |
| AKMV118 | 112,592-113,248 | 219   | CPXV121  | 219   | 98  | E4R  | 219   | 98  | EVM093 | 219   | 99  | Uracil-DNA glycosylase               |
| AKMV119 | 113,280-115,637 | 786   | CPXV122  | 786   | 98  | E5R  | 786   | 99  | EVM094 | 786   | 98  | NTPase                               |
| AKMV120 | 115,678-117,591 | 638   | CPXV123  | 638   | 99  | E6R  | 638   | 99  | EVM095 | 638   | 98  | VETF early transcription factor      |
| AKMV121 | 117,618-118,103 | 162   | CPXV124  | 162   | 97  | E7R  | 162   | 98  | EVM096 | 162   | 98  | RNA polymerase subunit RPO18         |
| AKMV122 | 118,066-118,980 | 305   | CPXV125  | 305   | 94  | E8L  | 305   | 94  | EVM097 | 305   | 95  | IMV membrane protein                 |
| AKMV123 | 119,022-119,663 | 214   | CPXV126  | 214   | 99  | E9R  | 214   | 99  | EVM098 | 214   | 99  | mRNA decapping enzyme                |
| AKMV124 | 119,660-120,406 | 249   | CPXV127  | 249   | 100 | E10R | 249   | 99  | EVM099 | 251   | 97  | mRNA decapping enzyme                |
| AKMV125 | 120,407-122,302 | 632   | CPXV128  | 632   | 99  | E11L | 632   | 99  | EVM100 | 632   | 98  | ATPase                               |
| AKMV126 | 122,336-123,199 | 288   | CPXV129  | 288   | 99  | E12L | 288   | 99  | EVM101 | 288   | 99  | mRNA capping enzyme small subunit    |
| AKMV127 | 123,161-123,379 | 73    | CPXV130  | 73    | 97  | -    | -     | -   | -      | -     | -   | -                                    |
| AKMV128 | 123,230-124,885 | 552   | CPXV131  | 552   | 99  | E13L | 552   | 99  | EVM102 | 552   | 99  | Trimeric virion coat protein         |
| AKMV129 | 124,909-125,361 | 151   | CPXV132  | 151   | 98  | A1L  | 151   | 97  | EVM103 | 151   | 97  | late transcription factor VLTF-2     |
| AKMV130 | 125,382-126,056 | 225   | CPXV133  | 225   | 100 | A2L  | 225   | 99  | EVM104 | 225   | 99  | Late transcription factor VLTF-3     |
| AKMV131 | 126,053-126,283 | 77    | CPXV134  | 77    | 84  | A3L  | 77    | 86  | EVM105 | 77    | 83  | S-S bond formation pathway protein   |
| AKMV132 | 126,298-128,232 | 645   | CPXV135  | 645   | 97  | A4L  | 645   | 98  | EVM106 | 645   | 98  | P4b precursor                        |
| AKMV133 | 128,285-129,133 | 283   | CPXV136  | 296   | 86  | A5L  | 284   | 92  | EVM107 | 282   | 92  | Core protein                         |

|         |                 |       |          |       |     |      |       |     |          |       |     |                                             |
|---------|-----------------|-------|----------|-------|-----|------|-------|-----|----------|-------|-----|---------------------------------------------|
| AKMV134 | 129,171-129,665 | 165   | CPXV137  | 165   | 99  | A6R  | 165   | 99  | EVM108   | 165   | 98  | RNA polymerase                              |
| AKMV135 | 129,662-130,780 | 373   | CPXV138  | 373   | 97  | A7L  | 373   | 97  | EVM109   | 373   | 96  | Virion core and cleavage processing protein |
| AKMV136 | 130,804-132,936 | 711   | CPXV139  | 711   | 99  | A8L  | 711   | 99  | EVM110   | 711   | 98  | Early gene transcription factor             |
| AKMV137 | 132,990-133,856 | 289   | CPXV140  | 289   | 99  | A9R  | 289   | 99  | EVM111   | 289   | 99  | VITF-3 32kd small subunit                   |
| AKMV138 | 133,893-134,195 | 101   | CPXV141  | 122   | 96  | A10L | 108   | 97  | EVM112   | 111   | 97  | Early morphogenesis protein                 |
| AKMV139 | 134,196-136,874 | 893   | CPXV142  | 895   | 95  | A11L | 892   | 97  | EVM113   | 892   | 97  | P4a precursor                               |
| AKMV140 | 136,889-137,845 | 319   | CPXV143  | 319   | 100 | A12R | 319   | 100 | EVM114   | 319   | 99  | Virial membrane formation                   |
| AKMV141 | 137,847-138,419 | 191   | CPXV144  | 191   | 97  | A13L | 195   | 93  | EVM115   | 192   | 94  | Virion core and cleavage processing protein |
| AKMV142 | 138,443-138,661 | 73    | CPXV145  | 71    | 90  | A14L | 69    | 88  | EVM116   | 67    | 86  | IMV membrane protein                        |
| AKMV143 | 138,768-139,040 | 91    | CPXV146  | 91    | 99  | A15L | 91    | 100 | EVM117   | 91    | 100 | Phosphorylated IMV membrane protein         |
| AKMV144 | 139,057-139,218 | 54    | CPXV147  | 54    | 100 | -    |       |     | EVM117.5 | 54    | 100 | Hydrophobic IMV membrane protein            |
| AKMV145 | 139,208-139,492 | 95    | CPXV148  | 95    | 98  | A16L | 95    | 98  | EVM118   | 95    | 96  | Core protein                                |
| AKMV146 | 139,476-140,609 | 378   | CPXV149  | 378   | 97  | A17L | 378   | 96  | EVM119   | 378   | 97  | Myristylate protein for entry               |
| AKMV147 | 140,612-141,235 | 208   | CPXV150  | 203   | 95  | A18L | 204   | 95  | EVM120   | 203   | 92  | IMV membrane protein                        |
| AKMV148 | 141,250-142,734 | 495   | CPXV151  | 493   | 96  | A19R | 494   | 95  | EVM121   | 494   | 95  | DNA helicase                                |
| AKMV149 | 142,715-142,948 | 78    | CPXV152  | 78    | 99  | A20L | 77    | 99  | EVM122   | 78    | 96  | Zinc finger-like protein                    |
| AKMV150 | 142,918-143,046 | 43    | CPXV152A | 82    | 93  | -    |       |     | -        |       |     | -                                           |
| AKMV151 | 142,949-143,302 | 118   | CPXV153  | 118   | 97  | A21L | 118   | 98  | EVM123   | 119   | 96  | IMV membrane protein                        |
| AKMV152 | 143,301-144,581 | 427   | CPXV154  | 427   | 95  | A22R | 427   | 96  | EVM124   | 427   | 95  | DNA Polymerase processing factor            |
| AKMV153 | 144,556-145,074 | 173   | CPXV155  | 188   | 99  | A23R | 188   | 99  | EVM125   | 188   | 98  | Holliday junction endonuclease              |
| AKMV154 | 145,094-146,242 | 383   | CPXV156  | 383   | 98  | A24R | 383   | 98  | EVM126   | 383   | 98  | VITF-3 large subunit                        |
| AKMV155 | 146,239-149,733 | 1,165 | CPXV157  | 1,165 | 99  | A25R | 1,165 | 99  | EVM127   | 1,165 | 99  | DNA-directed RNA polymerase                 |

-, no gene annotation or unknown function; Id %, amino acid identity from local BLAST; EEV, extracellular enveloped virion; IEV, intracellular enveloped virion; IMV, intracellular mature virion; VITF, vaccinia virus intermediate transcription factors.
