# Supplementary material for: Genome Sequences of Akhmeta Virus, an Early Divergent Old World Orthopoxvirus
Source: MDPI journal article supplement (doi:10.3390/v10050252), 2018-05-12
Supplement: s1 [file s1]

**Table S9.** dN/dS analysis of proteins within or adjacent to the recombination region

| CPXV_BR | CPXV_GRI-90 | AKMV    | Predicted Function                                 | Lrt<br>Statistic<br>(p value) | Sites:<br>AKMV_AKHM13 | Sites:<br>AKMV_VANI10 | Homologs Compared (reference genomes)                                                                                                                                                                            |
|---------|-------------|---------|----------------------------------------------------|-------------------------------|-----------------------|-----------------------|------------------------------------------------------------------------------------------------------------------------------------------------------------------------------------------------------------------|
| CPXV020 | C4L         | AKMV016 | Host range defense                                 | 15.40<br>p<0.001              | 158N                  | 162N                  | CPXV_BR, CPXV_GRI-90, CPXV_AUS99, CPXV_HUMGRA07/1, CPXV_HUMLIT08/1, CPXV_FRA01, CPXV_GER91, CPXV_GER02, CMLV_CMS, SKPV_WA, VPXV_CA                                                                               |
| CPXV021 | C5R         | AKMV017 | Secreted EGF-like protein, viral growth factor VGF | 0.04<br>NS                    | -                     | -                     | CPXV_BR, CPXV_GRI-90, CPXV_AUS99, CPXV_HUMGRA07/1, CPXV_HUMLIT08/1, CPXV_FRA01, CPXV_GER91, CPXV_GER02, HSPV_NMR76, CMLV_CMS, TATV_DAH, RPXV_UTR, MPXV_ZAI96, MPXV_LIB70, VARV_BRZ66, SKPV_WA, VPXV_CA           |
| CPXV022 | C6L         | AKMV018 | IL-1 receptor antagonist                           | 1.19<br>NS                    | -                     | -                     | CPXV_BR, CPXV_GRI-90, CPXV_AUS99, CPXV_HUMGRA07/1, CPXV_HUMLIT08/1, CPXV_FRA01, CPXV_GER91, CPXV_GER02, HSPV_NMR76, ECTV_MOS, RPXV_UTR, VARV_BRZ66                                                               |
| CPXV023 | C7R         | AKMV019 | p28/N1R family, Kila-N RING ubiquitin ligase       | 37.48<br>p<0.001              | 133T<br>142R<br>224I  | 134A<br>137H<br>219S  | CPXV_BR, CPXV_GRI-90, CPXV_AUS99, CPXV_HUMGRA07/1, CPXV_HUMLIT08/1, CPXV_FRA01, CPXV_GER91, CPXV_GER02, ECTV_MOS, CMLV_CMS, TATV_DAH, RPXV_UTR, MPXV_ZAI96, MPXV_LIB70, VARV_BRZ66, SKPV_WA, VPXV_CA             |
| CPXV024 | C8L         | AKMV020 | IL-18 binding                                      | 0<br>NS                       | -                     | -                     | CPXV_BR, CPXV_GRI-90, CPXV_AUS99, CPXV_HUMGRA07/1, CPXV_HUMLIT08/1, CPXV_FRA01, CPXV_GER91, CPXV_GER02, HSPV_NMR76, ECTV_MOS, TATV_DAH, RPXV_UTR, MPXV_ZAI96, MPXV_LIB70, VARV_BRZ66, SKPV_WA                    |
| CPXV025 | C9L         | AKMV021 | Ankyrin, host range VHRI                           | 0<br>NS                       | -                     | -                     | CPXV_BR, CPXV_GRI-90, CPXV_AUS99, CPXV_HUMGRA07/1, CPXV_HUMLIT08/1, CPXV_FRA01, CPXV_GER91, CPXV_GER02, TATV_DAH, MPXV_ZAI96, MPXV_LIB70, SKPV_WA, VPXV_CA                                                       |
| CPXV029 | C13L        | AKMV025 | Host range defense                                 | 9.49<br>p<0.01                | 38G                   | 38G                   | CPXV_BR, CPXV_GRI-90, CPXV_AUS99, CPXV_HUMGRA07/1, CPXV_HUMLIT08/1, CPXV_FRA01, CPXV_GER91, CPXV_GER02, HSPV_NMR76, ECTV_MOS, CMLV_CMS, TATV_DAH, RPXV_UTR, MPXV_ZAI96, MPXV_LIB70, VARV_BRZ66, SKPV_WA, VPXV_CA |
| CPXV030 | C14L        | AKMV026 | Unknown                                            | 1.15<br>NS                    | -                     | -                     | CPXV_BR, CPXV_GRI-90, CPXV_AUS99, CPXV_HUMGRA07/1, CPXV_HUMLIT08/1, CPXV_FRA01, CPXV_GER91, CPXV_GER02, HSPV_NMR76, ECTV_MOS, CMLV_CMS, TATV_DAH, RPXV_UTR, MPXV_ZAI96, MPXV_LIB70, VARV_BRZ66, SKPV_WA, VPXV_CA |
