# Supplementary material for: Genome Sequences of Akhmeta Virus, an Early Divergent Old World Orthopoxvirus
Source: MDPI journal article supplement (doi:10.3390/v10050252), 2018-05-12
Supplement: s1 [file s1]

**Table S7.** Comparison of the putative AKMV\_AKHM13-88 host range factors to CPXV\_BR

| Category       | Host range factor | Gene in AKMV | Homolog in CPXV_BR | Accession # | Size comparison AKMV/CPXV_BR | Amino Acid Identity % |
|----------------|-------------------|--------------|--------------------|-------------|------------------------------|-----------------------|
| -              | K3L               | AKMV039      | CPXV043            | NP_619832   | 88/88                        | 90.91                 |
| -              | E3L               | AKMV065      | CPXV069            | NP_619856   | 190/190                      | 93.68                 |
| C7L/C4         | C7L               | AKMV025      | CPXV029            | NP_619818   | 150/150                      | 94.00                 |
|                | C4L               | AKMV016*     | CPXV020            | NP_619809   | 168/170                      | 72.94                 |
| TNFR II Family | CrmB              | AKMV002*     | CPXV005            | NP_619793   | 348/355                      | 82.91                 |
|                | CrmC              | AKMV187*     | CPXV191            | NP_619973   | 168/187                      | 76.92                 |
|                | CrmD              | -*           | CPXV221            | NP_620001   |                              |                       |
|                | CrmE              | AKMV217*     | -                  |             |                              |                       |
| -              | T4                | AKMV198*     | CPXV203            | NP_619984   | 249/226                      | 84.44                 |
| Bcl-2 family   | M11/F1L           | AKMV044*     | CPXV048            | NP_619836   | 244/251                      | 84.52                 |
| Serpins        | SPI-1             | AKMV210*     | CPXV217            | NP_619997   | 360/372                      | 88.61                 |
|                | SPI-2             | AKMV202      | CPXV207            | NP_619988   | 344/341                      | 90.99                 |
|                | SPI-3             | AKMV038      | CPXV042            | NP_619831   | 373/373                      | 95.71                 |
| -              | P28-like          | AKMV019*     | CPXV023            | NP_619812   | 247/242                      | 86.69                 |
| -              | B5R               | AKMV194      | CPXV199            | NP_619980   | 317/317                      | 91.80                 |
| -              | C3L               | AKMV030*     | CPXV034            | NP_619823   | 263/263                      | 84.03                 |
| ANK/F-box      | Group 1           | AKMV208*     | CPXV213            | NP_619994   | 797/800                      | 87.27                 |
|                | Group 2           | AKMV008      | CPXV011            | NP_619800   | 659/658                      | 90.24                 |
|                | Group 3           | AKMV206      | CPXV211            | NP_619992   | 575/574                      | 90.96                 |
|                | Group 4           | AKMV212      | CPXV220            | NP_620000   | 580/579                      | 93.80                 |
|                | Group 5           | AKMV003*     | CPXV006            | NP_619794   | 592/619                      | 82.44                 |
|                | Group 6           | AKMV193      | CPXV198            | NP_619979   | 556/558                      | 93.19                 |
|                | Group 7           | AKMV021*     | CPXV025            | NP_619814   | 672/668                      | 79.02                 |
|                | Group 8           | AKMV013*     | CPXV017            | NP_619806   | 428/435                      | 78.37                 |
|                | Group 9           | AKMV023*     | CPXV027            | NP_619816   | 644/632                      | 83.72                 |
|                | Group 10          | AKMV005*     | CPXV008            | NP_619796   | 671/672                      | 85.58                 |
| -              | K1L               | AKMV037      | CPXV041            | NP_619830   | 284/284                      | 92.25                 |

\*, factors showing lower identity (<90%), or deletion, or truncation between AKMV\_AKHM13-88 and CPXV-BR.
