# Supplementary material for: Genome Sequences of Akhmeta Virus, an Early Divergent Old World Orthopoxvirus
Source: MDPI journal article supplement (doi:10.3390/v10050252), 2018-05-12
Supplement: s1 [file s1]

**Table S8.** Comparison of AKMV\_VANI10 orthologs to the proteins of AKMV\_AKHM13-88 and CPXV\_GRI-90 encoded within or flanking the recombination region

| AKMV_VANI10<br>(tentative) | AKMV_AKHM13            | CPXV_GRI-90         |
|----------------------------|------------------------|---------------------|
| ORF013                     | <b>99.53</b> (AKMV013) | <b>79.32</b> (C1L ) |
| ORF014                     | <b>80.34</b> (AKMV014) | <b>73.60</b> (C2L)  |
| ORF015*                    | <b>74.29</b> (AKMV015) | <b>90.43</b> (C3L)  |
| ORF016                     | <b>73.84</b> (AKMV016) | <b>89.53</b> (C4L)  |
| ORF017                     | <b>76.26</b> (AKMV017) | <b>86.96</b> (C5R)  |
| ORF018                     | <b>84.73</b> (AKMV018) | <b>94.26</b> (C6L)  |
| OFF019                     | <b>85.08</b> (AKMV019) | <b>94.21</b> (C7R)  |
| ORF020                     | <b>86.05</b> (AKMV020) | <b>90.70</b> (C8L)  |
| ORF021                     | <b>97.62</b> (AKMV021) | <b>79.70</b> (C9L)  |

Bold number is aa identity; gene names are indicated in parenthesis; \*, identity after a 281 aa internal gap was stripped from protein sequence alignment.
