# Supplementary material for: Genome Sequences of Akhmeta Virus, an Early Divergent Old World Orthopoxvirus
Source: MDPI journal article supplement (doi:10.3390/v10050252), 2018-05-12
Supplement: s1 [file s1]

**Table S5.** Identity matrix of the highly conserved central region of the 22 selected OPXVs

|                    | 1     | 2     | 3     | 4     | 5     | 6     | 7     | 8     | 9     | 10    | 11    | 12    | 13    | 14    | 15    | 16    | 17    | 18    | 19    | 20    | 21    | 22 |
|--------------------|-------|-------|-------|-------|-------|-------|-------|-------|-------|-------|-------|-------|-------|-------|-------|-------|-------|-------|-------|-------|-------|----|
| 1. AKMV_AKHM13-88  |       |       |       |       |       |       |       |       |       |       |       |       |       |       |       |       |       |       |       |       |       |    |
| 2. AKMV_VANI10     | 99.42 |       |       |       |       |       |       |       |       |       |       |       |       |       |       |       |       |       |       |       |       |    |
| 3. CPXV_AUS99      | 95.76 | 95.71 |       |       |       |       |       |       |       |       |       |       |       |       |       |       |       |       |       |       |       |    |
| 4. CPXV_GRI-90     | 95.71 | 95.67 | 98.87 |       |       |       |       |       |       |       |       |       |       |       |       |       |       |       |       |       |       |    |
| 5. CPXV_HumLit08/1 | 95.72 | 95.69 | 98.96 | 98.95 |       |       |       |       |       |       |       |       |       |       |       |       |       |       |       |       |       |    |
| 6. CPXV_HumGra07/1 | 95.81 | 95.76 | 98.73 | 98.51 | 98.69 |       |       |       |       |       |       |       |       |       |       |       |       |       |       |       |       |    |
| 7. CPXV_FRA01      | 95.42 | 95.38 | 97.90 | 98.03 | 98.01 | 97.83 |       |       |       |       |       |       |       |       |       |       |       |       |       |       |       |    |
| 8. CPXV_BR         | 95.42 | 95.39 | 97.82 | 97.97 | 97.93 | 97.75 | 98.67 |       |       |       |       |       |       |       |       |       |       |       |       |       |       |    |
| 9. CPXV_GER02      | 95.74 | 95.70 | 98.47 | 98.42 | 98.53 | 98.55 | 98.18 | 98.07 |       |       |       |       |       |       |       |       |       |       |       |       |       |    |
| 10. TATV_DAH       | 95.68 | 95.64 | 98.46 | 98.28 | 98.52 | 98.95 | 97.65 | 97.53 | 98.32 |       |       |       |       |       |       |       |       |       |       |       |       |    |
| 11. VACV_LIST107   | 95.57 | 95.54 | 98.80 | 98.74 | 98.82 | 98.42 | 97.79 | 97.73 | 98.36 | 98.21 |       |       |       |       |       |       |       |       |       |       |       |    |
| 12. VACV_CVA       | 95.57 | 95.52 | 98.78 | 98.73 | 98.87 | 98.45 | 97.81 | 97.77 | 98.37 | 98.23 | 99.42 |       |       |       |       |       |       |       |       |       |       |    |
| 13. VACV_ACAM      | 95.54 | 95.50 | 98.77 | 98.72 | 98.82 | 98.42 | 97.79 | 97.73 | 98.33 | 98.20 | 99.37 | 99.46 |       |       |       |       |       |       |       |       |       |    |
| 14. RPXV_UTR       | 95.52 | 95.49 | 98.76 | 98.73 | 98.83 | 98.38 | 97.79 | 97.74 | 98.33 | 98.17 | 99.39 | 99.40 | 99.33 |       |       |       |       |       |       |       |       |    |
| 15. CMLV_CMS       | 95.48 | 95.44 | 98.23 | 98.07 | 98.30 | 98.72 | 97.43 | 97.30 | 98.10 | 99.24 | 97.98 | 98.00 | 97.98 | 97.95 |       |       |       |       |       |       |       |    |
| 16. ECTV_MOS       | 95.37 | 95.35 | 97.59 | 97.67 | 97.61 | 97.49 | 97.43 | 97.34 | 97.49 | 97.24 | 97.42 | 97.41 | 97.43 | 97.41 | 97.02 |       |       |       |       |       |       |    |
| 17. HSPV_MNR76     | 95.30 | 95.26 | 98.61 | 98.37 | 98.55 | 98.24 | 97.48 | 97.41 | 97.96 | 98.01 | 99.05 | 99.07 | 99.15 | 99.04 | 97.79 | 97.09 |       |       |       |       |       |    |
| 18. MPXV_LIB70     | 95.15 | 95.11 | 98.17 | 98.19 | 98.18 | 97.87 | 97.49 | 97.43 | 97.84 | 97.71 | 98.00 | 98.02 | 98.01 | 98.06 | 97.49 | 97.15 | 97.70 |       |       |       |       |    |
| 19. MPXV_ZAI96     | 95.12 | 95.10 | 98.16 | 98.19 | 98.17 | 97.86 | 97.48 | 97.41 | 97.84 | 97.69 | 98.01 | 98.02 | 98.01 | 98.06 | 97.48 | 97.14 | 97.69 | 99.66 |       |       |       |    |
| 20. VARV_BSH74     | 95.13 | 95.10 | 97.78 | 97.62 | 97.83 | 98.26 | 97.02 | 96.90 | 97.65 | 98.75 | 97.55 | 97.57 | 97.56 | 97.53 | 98.54 | 96.66 | 97.37 | 97.10 | 97.07 |       |       |    |
| 21. VARV_BRZ66     | 95.12 | 95.10 | 97.79 | 97.62 | 97.84 | 98.27 | 97.03 | 96.92 | 97.66 | 98.76 | 97.56 | 97.58 | 97.57 | 97.54 | 98.54 | 96.65 | 97.38 | 97.10 | 97.08 | 99.72 |       |    |
| 22. RCNV_HRM       | 86.73 | 86.72 | 86.79 | 86.85 | 86.84 | 86.82 | 86.77 | 86.82 | 86.79 | 86.75 | 86.72 | 86.74 | 86.72 | 86.73 | 86.65 | 86.65 | 86.62 | 86.58 | 86.56 | 86.51 | 86.52 |    |
