# Supplementary material for: Genome Sequences of Akhmeta Virus, an Early Divergent Old World Orthopoxvirus
Source: Viruses. 2018 May 12;10(5):252. doi: 10.3390/v10050252 (PMC5977245; doi:10.3390/v10050252)
Supplement: Supplementary file 1 [file viruses-10-00252-s001.zip]

Archive with 12 entries (12 files):
- Table S2.pdf
- Table S3.pdf
- Table S5.pdf
- Table S7.pdf
- Table S8.pdf
- Table S6.pdf
- Table S9.pdf
- Table S4.pdf
- Figure S1_updated.pdf
- Figure S2_updated.pdf
- Figure S3_updated.pdf
- Table S1_updated.pdf
